# Supplementary material for: Study on hydrothermal liquefaction for cell disruption and lipid extraction from Rhodosporidium toruloides
Source: Royal Society of Chemistry journal article supplement (doi:10.1039/d1se01254a), 2021-01-01
Supplement: d1se01254a1.pdf [file d1se01254a1.pdf]

## Supplementary Information

### Study on hydrothermal liquefaction for cell disruption and lipid extraction from

#### *Rhodosporidium toruloides*

Yuwei Chen<sup>1,2,3, #</sup>, Qitian Huang<sup>4, #</sup>, Jun Ye<sup>1,2\*</sup>, Junming Xu<sup>1,2</sup>,  
Jie Chen<sup>1,2</sup>, Yigang Wang<sup>1,2</sup>, Xiaoan Nie<sup>1,2\*</sup>

<sup>1</sup> Institute of Chemical Industry of Forest Products, Chinese Academy of Forestry, Key Lab. of Biomass Energy and Material, Jiangsu Province, Nanjing, 210042, P. R. China

<sup>2</sup> Co-Innovation Center of Efficient Processing and Utilization of Forest Resources, Nanjing Forestry University, Nanjing 210037, P. R. of China

<sup>3</sup> Yancheng Institute of Technology, Yancheng, 224051, P. R. of China

<sup>4</sup> Laboratory of Biotechnology, Dalian Institute of Chemical Physics, CAS, Dalian 116023, China

# These authors contributed equally to this work.

\* Corresponding author: Jun Ye, [yejun\\_2007@163.com](mailto:yejun_2007@163.com); Xiaoan Nie, [niexiaoan@icifp.cn](mailto:niexiaoan@icifp.cn)

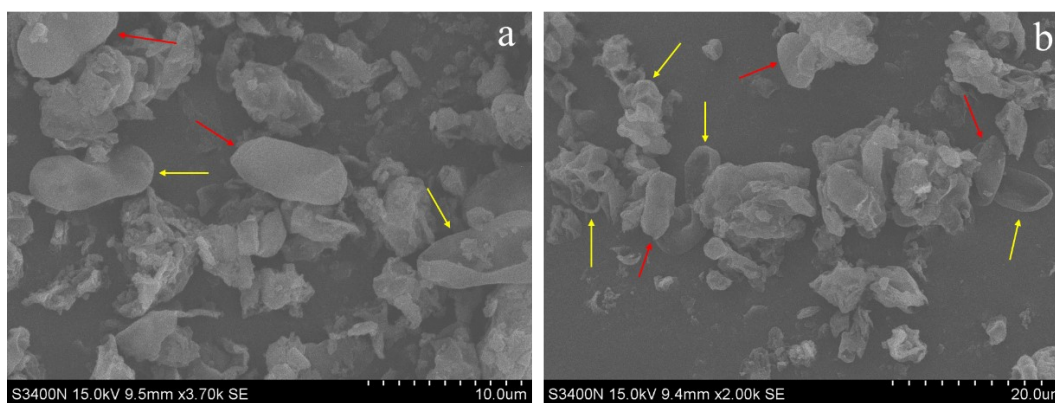

Figure S1. (a) (b) Microscopic Morphology of Solids after HTL (140°C, 10/100 g/mL, 60min, ethanol) from different samples. Red arrows point intact cells, yellow arrows point disrupted cells.

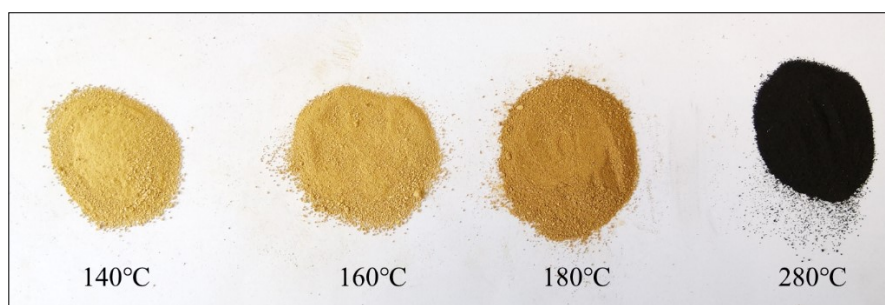

Figure S2. Solids after HTL in different temperatures (10/100 g/mL, 60min, ethanol)

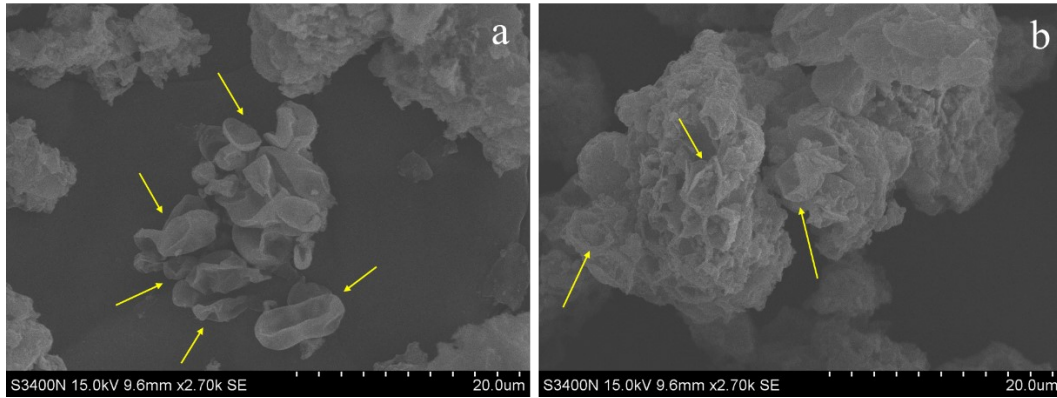

Figure S3. (a) (b) Microscopic Morphology of Solids after HTL (180°C, 10/100 g/mL, 60min, ethanol) from different samples. Yellow arrows point disrupted cells.

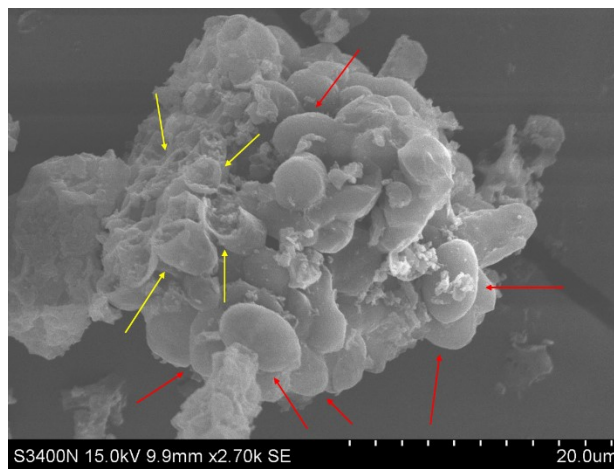

Figure S4. Microscopic Morphology of Solids after HTL (160°C, 5/100 g/mL, 60min, n-hexane) from different samples. Red arrows point intact cells, yellow arrows point disrupted cells.

Table S1 Crude fat in solids from different temperatures

| Temperature (°C) | 140        | 160        | 180        |
|------------------|------------|------------|------------|
| Crude fat (%)    | 17.55±0.10 | 14.05±0.23 | 13.56±0.15 |
